# Supplementary material for: Bio-inspired noble metal-free reduction of nitroarenes using NiS2+x/g-C3N4
Source: Royal Society of Chemistry journal article supplement (doi:10.1039/c4ra10127h), 2014-11-03
Supplement: c4ra10127h1.pdf [file c4ra10127h1.pdf]

## Electronic Supplementary Information

### Bioinspired Noble-Metal-Free Reduction of Nitroarenes over

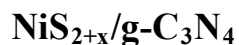

Ya-Nan Zhang, Xin-Hao Li,\* Yi-Yu Cai, Ling-Hong Gong, Kai-Xue Wang\* and Jie-Sheng Chen

School of Chemistry and Chemical Engineering, Shanghai Jiao Tong University, Shanghai 200240,  
People's Republic of China.

\*e-mail: [xinhaoli@sjtu.edu.cn](mailto:xinhaoli@sjtu.edu.cn) (XHL), [k.wang@sjtu.edu.cn](mailto:k.wang@sjtu.edu.cn) (KXW)

**Chemicals:** Cyanamide (Aldrich, 50 wt% in H<sub>2</sub>O, contains 0.1 % formic acid as stabilizer), Ludox HS40 solution (Alfa Aesar, Silicon(IV) oxide, 40 % in H<sub>2</sub>O, colloidal dispersion), Hydrofluoric acid (HF, Sinopharm Chemical Reagent Co., Ltd., ≥40.0%), Ethanol (CH<sub>3</sub>CH<sub>2</sub>OH, Sinopharm Chemical Reagent Co., Ltd., ≥99.7%) Dicyandiamide (DCDA, Acros Organics, 99.5%), Monohydrate glucose (AppliChem, pure Ph. Eur.). Acetylene black (C, carbon black, commercially available), Nickel nitrate hexahydrate (Ni(NO<sub>3</sub>)<sub>2</sub>•6H<sub>2</sub>O Sinopharm Chemical Reagent Co., Ltd., ≥98.0%), Thioacetamide (TAA, Sinopharm Chemical Reagent Co., Ltd., ≥99.0%), Dichloromethane (CH<sub>2</sub>Cl<sub>2</sub>, Sinopharm Chemical Reagent Co., Ltd., ≥99.5%).

#### 1. Procedure for catalyst preparation

##### 1.1. Synthesis of 9 wt. % NiS<sub>2+x</sub>/CN

Mesoporous carbon nitride was obtained according to Ref. 18. Briefly, 5 g of cyanamide was dissolved in 7.5 g of Ludox HS40 solution (dispersion of 12-nm SiO<sub>2</sub> particles with 40 wt% in water) and heated at 65 °C overnight to remove water. The as-formed white powder was heated at a temperature of 600 °C for 4 h (ramp: 2.3 °C min<sup>-1</sup>) under the protection of N<sub>2</sub>. The resulting brown-yellow powder was treated with a 4 M HF solution for 24 h to remove the silica template.

The powders were then centrifuged and washed three times with distilled water and twice with ethanol. Finally the powders were dried at 60 °C in vacuum overnight.

200 mg of the as-prepared mpg-CN was dispersed into 20 mL of distilled water with 0.2 mmol Ni(NO<sub>3</sub>)<sub>2</sub> via sonication and vigorous stir for about two days. Then 0.153 g of TAA was added while stirring at room temperature for about two hours. And then the mixture were treated at 80 °C stirring for three days. The obtained mixture was separated via centrifugation, washed thoroughly with distilled water and ethanol and finally dried in vacuum at 60 °C overnight.

### **1.2. Synthesis of 9 wt. % NiS<sub>2+x</sub>/C**

200 mg of carbon black was dispersed into 20 mL of distilled water with 0.2 mmol Ni(NO<sub>3</sub>)<sub>2</sub> via sonication and vigorous stir for about two days. Then 0.153 g of TAA was added while stirring at room temperature for about two hours. And then the mixture were treated at 80 °C stirring for three days. The obtained mixture was separated via centrifugation, washed thoroughly with distilled water and ethanol and finally dried in vacuum at 60 °C overnight.

### **1.3. Synthesis of 9 wt. % NiS<sub>2+x</sub>/N-LC**

Nitrogen-doped layered carbon was obtained according to Ref. 39 In summary, a mixture of dicyandiamide (5 g) and glucose (1 g) was heated at a temperature of 900 °C for 1 hour (ramp: 2.3 °C min<sup>-1</sup> under protecting N<sub>2</sub> flow. 200 mg of the as-formed N-LC was dispersed into 20 mL of distilled water with 0.2 mmol Ni(NO<sub>3</sub>)<sub>2</sub> via sonication and vigorous stir for about two days. Then 0.153 g of TAA was added while stirring at room temperature for about two hours. And then the mixture were treated at 80 °C stirring for three days. The obtained mixture was separated via centrifugation, washed thoroughly with distilled water and ethanol and finally dried in vacuum at 60 °C overnight.

#### **1.4. Activation of the used catalyst**

200 mg of the used catalyst was dispersed into 20 mL of distilled water with 0.2 mmol  $\text{Ni}(\text{NO}_3)_2$  via sonication and vigorous stir for about two days. Then 0.153 g of TAA was added while stirring at room temperature for about two hours. And then the mixture were treated at 80 °C stirring for three days. The obtained mixture was separated via centrifugation, washed thoroughly with distilled water and ethanol and finally dried in vacuum at 60 °C overnight.

### **2. Catalytic reduction of aromatic nitro compounds**

#### **2.1. Testing of $\text{NiS}_2$ loaded g-CN catalyst**

0.5 mmol substrate and 10 mg of catalyst was dispersed into 2 mL distilled water via sonication and vigorous stir for about 3 minutes. Then 50 mL of fresh  $\text{NaBH}_4$  (0.5 mmol) aqueous solution was added into the mixture while stirring at room temperature for 1 hour. Afterwards, the catalyst was separated via filter. The sample obtained by extraction in  $\text{CH}_2\text{Cl}_2$  was used for GC analysis. Conversions and selectivity were determined by GC-FID (HP6890 with FID detector, column HP530 m x 250 mm x 0.25  $\mu\text{m}$ ).

#### **2.2 Recycle test of the reduction of 4-nitrophenol with 9 wt. % $\text{NiS}_{2+x}/\text{CN}$**

1 mmol 4-nitrophenol and 20 mg catalyst was dispersed into 4 mL distilled water via sonication and vigorous stir for about 3 minutes. Then 100 mL fresh  $\text{NaBH}_4$  (1 mmol) aqueous solution was added into the mixture while stirring at room temperature for 1 hour. The product was extracted by  $\text{CH}_2\text{Cl}_2$  every one hour. And the catalyst was separated via filter for recycling. Then the catalyst was reused again in the same condition.

### **3. Catalyst characterization**

The **TEM** and **HRTEM** measurements were taken with a JEM-2100F microscope operated at an acceleration voltage of 200 kV measurements. **Nitrogen sorption** experiments were performed

with a Quadrasorb at 77 K, and data analysis was performed with Quantachrome software. Samples were degassed at 150 °C for 20 h before measurements. The **PXRD** measurements were performed on a Rigaku D/Max 2550 X-ray diffractometer operating at the Cu K $\alpha$ 1 radiation. The **XPS** measurements were performed on a Kratos AXIS ULTRA DLD X-ray photoelectron spectrometer with a monochromatized X-ray source (Al KR  $h\nu = 1486.6$  eV). The photoluminescent (**PL**) emission spectra were recorded on a QM-4-CW (Photo technology international, Int.USA/CAN). The **FTIR** spectra were recorded using a Bruker IFS 66v/S FTIR spectrometer equipped with a deuterated triglycine sulfate (DTGS) detector. The **UV-vis** spectrophotometer (UV-3600) was employed to obtain the diffuse reflectance spectra of the samples. The **GC** analysis was performed on Shimadzu GC-2014 gas chromatograph.

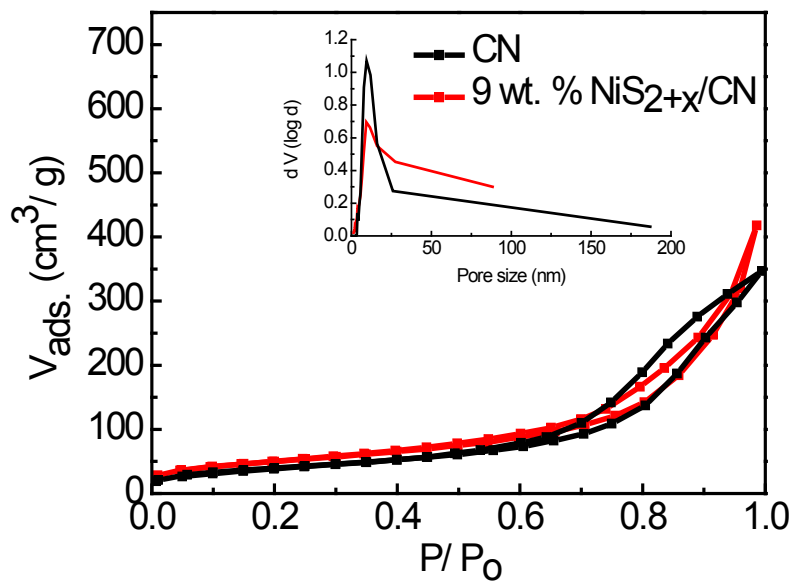

**Figure S1.** Nitrogen sorption of pure CN and 9 wt. % NiS<sub>2+x</sub>/CN catalyst. Inset: pore-size distributions.

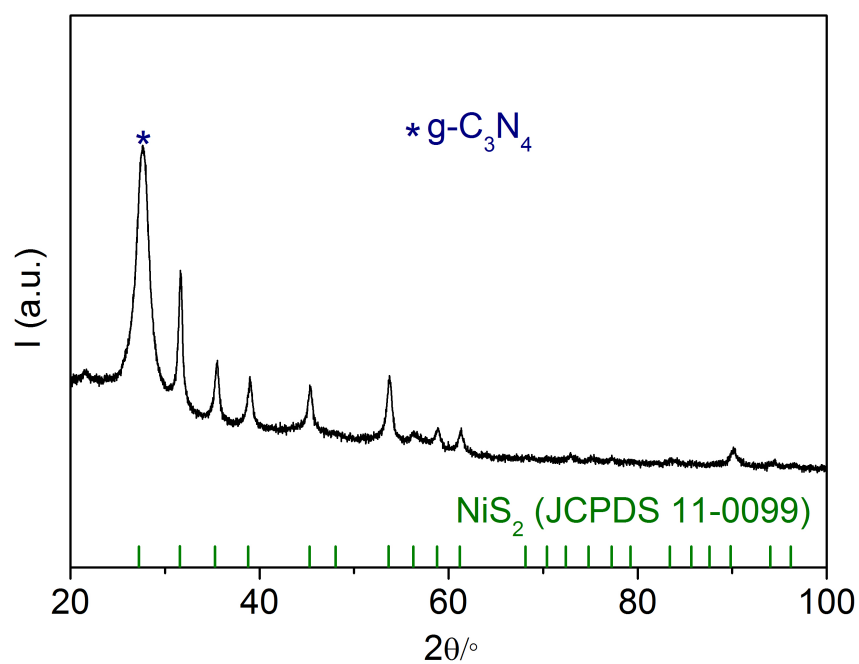

Figure S2. XRD profile for 9 wt. % NiS<sub>2+x</sub>/CN catalyst.

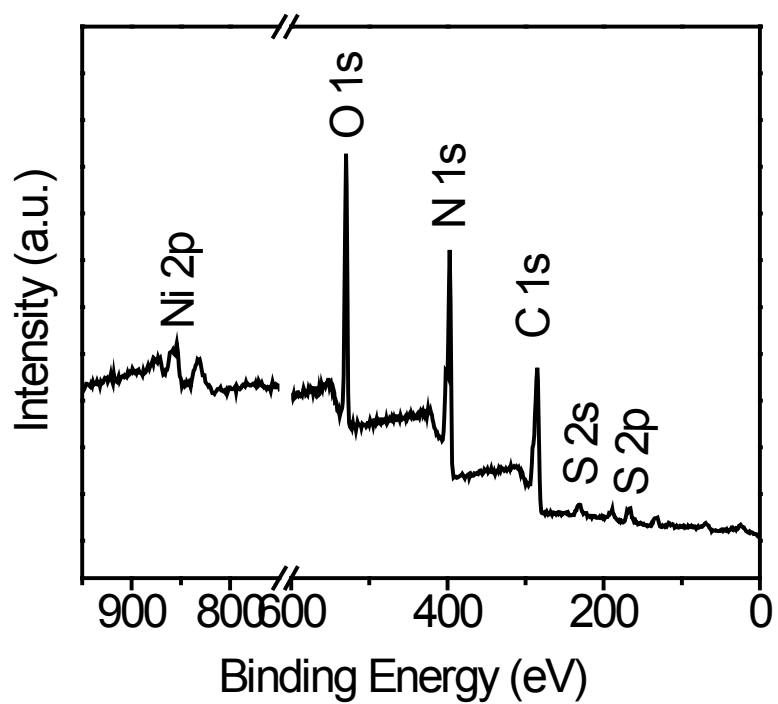

Figure S3. XPS spectra of 9 wt. % NiS<sub>2+x</sub>/CN catalyst.

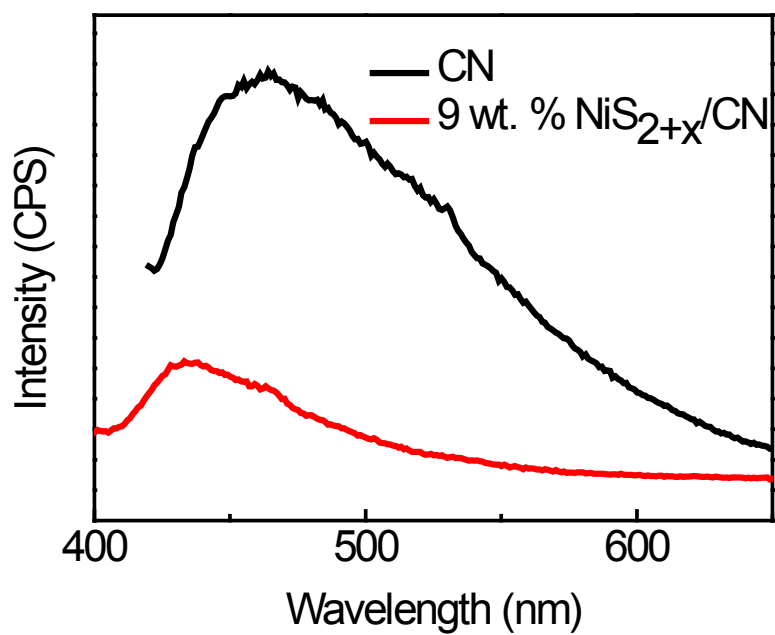

**Figure S4.** Photoluminescence (PL) spectra of bare mesoporous carbon nitride (CN) and 9 wt. % NiS<sub>2+x</sub>/CN catalyst. The decreased photoluminescence intensity (red line) of carbon nitride after the introduction of NiS<sub>2+x</sub> NPs rather speaks for an electron transfer from carbon nitride to NiS<sub>2+x</sub> NPs.

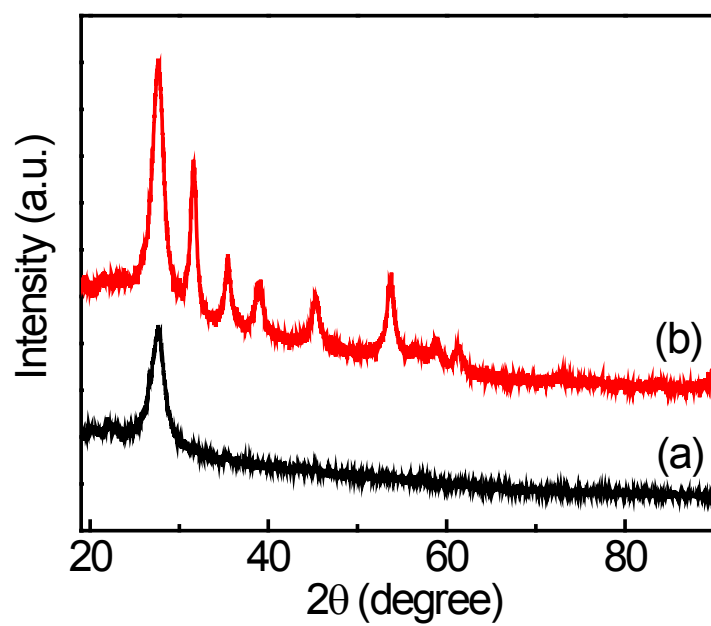

**Figure S5.** XRD profiles for (a) used 9 wt. %  $\text{NiS}_{2+x}/\text{CN}$  and (b) the regenerated 9 wt. %  $\text{NiS}_{2+x}/\text{CN}$  catalyst.



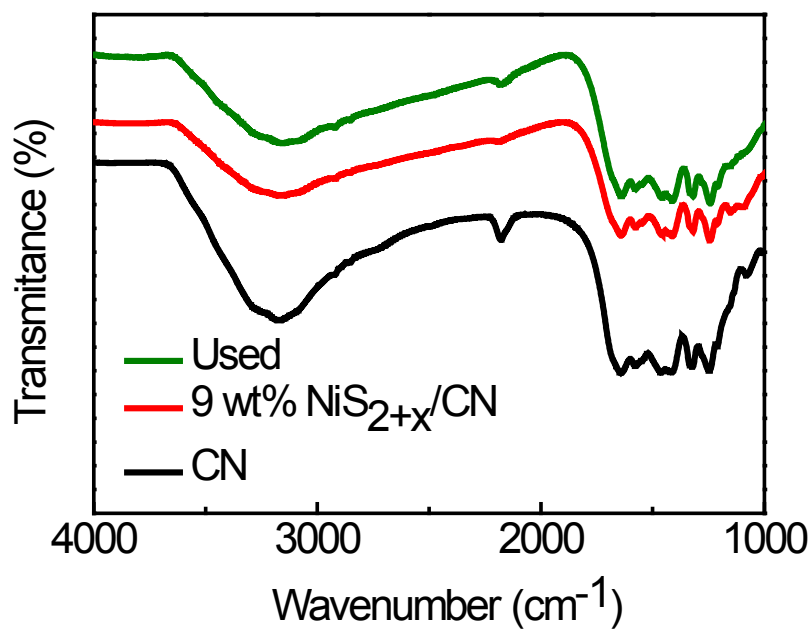

**Figure S6.** FTIR profiles for bare mesoporous carbon nitride (CN), 9 wt. % NiS<sub>2+x</sub>/CN catalyst and the used 9 wt. % NiS<sub>2+x</sub>/CN catalyst. The infrared absorption around 3200 cm<sup>-1</sup> is indicative of secondary and primary amines. The peaks of C–N heterocycle stretches of the extended network connection in the 1100–1600 cm<sup>-1</sup> region are also very strong and sharp, again speaking for the well development of polymeric melon network in g-C<sub>3</sub>N<sub>4</sub>.

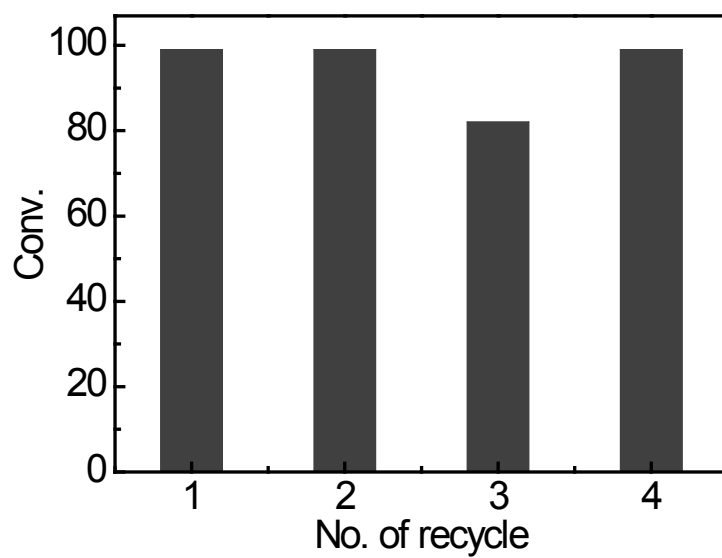

**Figure S7.** Conversion of 4-nitrophenol over used 9 wt. % NiS<sub>2+x</sub>/CN (No. 1-3) and the regenerated 9 wt. % NiS<sub>2+x</sub>/CN catalyst in the presence of NaBH<sub>4</sub> (No. 4)

**Table S1.** Testing of different amount of NiS<sub>2</sub> loaded on CN. Reaction condition: 0.5 mmol nitrobenzene, 50 mL of water, 10 mg of catalyst, 0.5 mmol NaBH<sub>4</sub>, room temperature, 1 h.

| Entry          | Catalyst                    | Conv.[%] | Sel.[%] |
|----------------|-----------------------------|----------|---------|
| 1              | 1wt.% NiS <sub>2</sub> /CN  | 8        | 0       |
| 2 <sup>a</sup> | 3wt.% NiS <sub>2</sub> /CN  | 15       | 14      |
| 3 <sup>a</sup> | 6wt.% NiS <sub>2</sub> /CN  | 16       | 31      |
| 4              | 9wt.% NiS <sub>2</sub> /CN  | >99      | >99     |
| 5 <sup>a</sup> | 12wt.% NiS <sub>2</sub> /CN | >99      | 95      |
| 6 <sup>a</sup> | 15wt.% NiS <sub>2</sub> /CN | >99      | 86      |

<sup>a</sup>The byproduct is nitrosobenzene

**Table S2.** Testing of catalysts (9 wt. %) prepared at different temperatures. Reaction condition: 0.5 mmol nitrobenzene, 50 mL of water, 10 mg of catalyst, 0.5 mmol NaBH<sub>4</sub>, room temperature, 1 h.

| Entry | T/ (°C) | Conv.[%] | Sel.[%] |
|-------|---------|----------|---------|
| 1     | 30      | -        | -       |
| 2     | 80      | >99      | >99     |
| 3     | 160     | 99       | 77      |

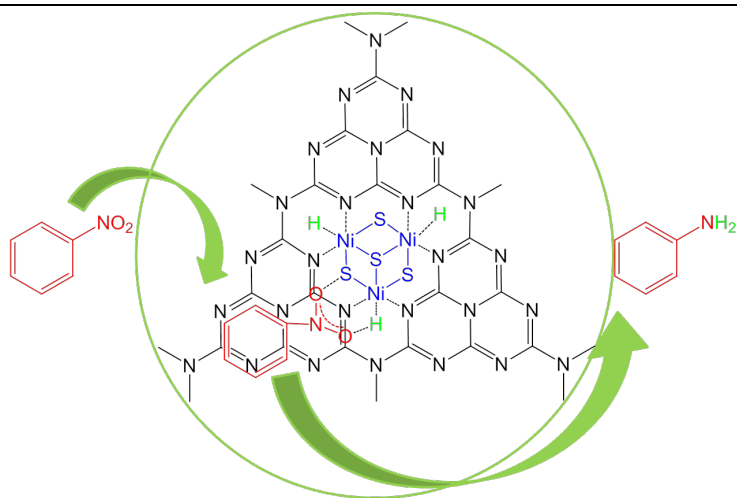

---

**Scheme S1. Proposed reaction mechanism.** The unique heterocyclic macrocycle structure of  $g\text{-C}_3\text{N}_4$  with an N–C–N– bonding pattern makes it easily contact with the aromatic ring. The hydrogen atoms were activated by the ([Ni-S] or [Ni-N]) centers and then transferred to the nitrobenzene. Indeed, a certain amount of nitrosobenzene can be detected as the byproduct when the content of the  $\text{NiS}_{2+X}$  in the catalyst was not optimized (Table S1). This is to say that the support effect of  $g\text{-C}_3\text{N}_4$  dominated the activity of  $\text{NiS}_{2+X}$  nanoparticles. Under optimized conditions with a suitable loading amount of  $\text{NiS}_{2+X}$  on  $g\text{-C}_3\text{N}_4$  (9 wt. %), aniline was the only reaction product observed (on the basis of GC analysis) with a selectivity of > 99%.
